# Supplementary material for: Specific Salivary Neuropeptides Shift Synchronously during Acute Stress in Fire Recruits
Source: MDPI journal article supplement (doi:10.3390/brainsci14050492), 2024-05-13
Supplement: s1 [file s1]

## Supplemental Tables

**Supplemental Table S1—Demographics Data**

|                           | Number          | %     |
|---------------------------|-----------------|-------|
| Gender                    |                 |       |
| Male                      | 22              | 91.7  |
| Female                    | 2               | 8.3   |
| Age                       |                 |       |
| 20-30                     | 15              | 62.5  |
| 30-40                     | 9               | 37.5  |
| Race                      |                 |       |
| White                     | 21              | 87.5  |
| Black                     | 2               | 8.3   |
| Asian                     | 1               | 4.2   |
| Pacific Islander          | 0               | 0     |
| Native American           | 0               | 0     |
| Ethnicity = Hispanic      | 2               | 8.3   |
| Prior Military Experience | 3               | 12.5  |
| Prior Dx of PTSD          | 2               | 8.3   |
|                           | Mean(Std. Dev.) | Range |
| Prior EMT Experience      | 6.54            | 3-15  |

n=24

**Supplemental Table S2—Descriptive Statistics data**

### Time Point 1

| Variable           | Mean     | Std Dev  | N  | Median   | Minimum | Maximum   |
|--------------------|----------|----------|----|----------|---------|-----------|
| $\alpha$ -MSH      | 46728.11 | 40950.24 | 24 | 40691.87 | 2312.13 | 200233.00 |
| $\beta$ -Endorphin | 47217.32 | 93332.21 | 24 | 28263.25 | 3878.74 | 486672.87 |
| Neurotensin        | 9130.17  | 12287.15 | 24 | 6838.25  | 1393.87 | 66090.47  |
| Oxytocin           | 25499.64 | 23225.90 | 24 | 22090.52 | 3999.24 | 129435.74 |
| Substance P        | 9765.98  | 10029.94 | 24 | 7066.87  | 824.64  | 51221.40  |

### Time Point 2

| Variable           | Mean     | Std Dev  | N  | Median   | Minimum  | Maximum   |
|--------------------|----------|----------|----|----------|----------|-----------|
| $\alpha$ -MSH      | 74845.15 | 46459.35 | 24 | 60424.90 | 13206.48 | 186345.12 |
| $\beta$ -Endorphin | 48231.87 | 29307.81 | 24 | 40399.10 | 11975.40 | 116304.85 |

|             |          |          |    |          |          |          |
|-------------|----------|----------|----|----------|----------|----------|
| Neurotensin | 11787.72 | 7176.59  | 24 | 10577.34 | 3489.04  | 39111.77 |
| Oxytocin    | 30593.81 | 11299.19 | 24 | 28596.01 | 11395.82 | 51203.16 |
| Substance P | 12082.35 | 6513.47  | 24 | 10119.87 | 2778.03  | 26453.02 |

### Time Point 3

| Variable           | Mean     | Std Dev   | N  | Median   | Minimum | Maximum   |
|--------------------|----------|-----------|----|----------|---------|-----------|
| $\alpha$ -MSH      | 80833.44 | 67666.29  | 24 | 59833.63 | 2083.43 | 200233.00 |
| $\beta$ -Endorphin | 85903.59 | 142537.29 | 24 | 34621.97 | 3281.83 | 116304.85 |
| Neurotensin        | 26507.88 | 60120.97  | 24 | 8910.79  | 808.46  | 300000.00 |
| Oxytocin           | 47393.27 | 65679.87  | 24 | 29050.90 | 3306.36 | 317867.88 |
| Substance P        | 16685.82 | 16544.47  | 24 | 10731.83 | 821.42  | 51221.40  |
